# Supplementary material for: Assessment of Radiation Induced Therapeutic Effect and Cytotoxicity in Cancer Patients Based on Transcriptomic Profiling
Source: MDPI journal article supplement (doi:10.3390/ijms17020250), 2016-02-19
Supplement: s1 [file s1]

# Supplementary Materials: Assessment of Radiation Induced Therapeutic Effect and Cytotoxicity in Cancer Patients Based on Transcriptomic Profiling

Sajjad Karim, Zeenat Mirza, Adeel G. Chaudhary, Adel M. Abuzenadah, Mamdooh Gari and Mohammed H. Al-Qahtani

**Table S3.** Top functional annotations identified by GO analysis.

| GO ID   | Function                                                           | Enrichment Score | Enrichment <i>p</i> -Value | % Genes in Group That Are Present |
|---------|--------------------------------------------------------------------|------------------|----------------------------|-----------------------------------|
| 2376    | Immune system process                                              | 36.9101          | $9.34 \times 10^{-17}$     | 4.83696                           |
| 46649   | Lymphocyte activation                                              | 36.6413          | $1.22 \times 10^{-16}$     | 10.8025                           |
| 45321   | Leukocyte activation                                               | 35.9238          | $2.5 \times 10^{-16}$      | 9.64467                           |
| 2682    | Regulation of immune system process                                | 32.6924          | $6.34 \times 10^{-15}$     | 5.03018                           |
| 30217   | T cell differentiation                                             | 32.5937          | $6.99 \times 10^{-15}$     | 19.4175                           |
| 2694    | Regulation of leukocyte activation                                 | 31.9539          | $1.33 \times 10^{-14}$     | 8.53933                           |
| 50865   | Regulation of cell activation                                      | 31.3614          | $2.4 \times 10^{-14}$      | 8.1761                            |
| 51249   | Regulation of lymphocyte activation                                | 31.2634          | $2.65 \times 10^{-14}$     | 9.06736                           |
| 42110   | T cell activation                                                  | 30.6735          | $4.77 \times 10^{-14}$     | 12.381                            |
| 70489   | T cell aggregation                                                 | 30.6735          | $4.77 \times 10^{-14}$     | 12.381                            |
| 71593   | Lymphocyte aggregation                                             | 30.4459          | $5.99 \times 10^{-14}$     | 12.2642                           |
| 70486   | Leukocyte aggregation                                              | 29.7789          | $1.17 \times 10^{-13}$     | 11.9266                           |
| 1775    | Cell activation                                                    | 29.4058          | $1.7 \times 10^{-13}$      | 7.06076                           |
| 2696    | Positive regulation of leukocyte activation                        | 28.4235          | $4.53 \times 10^{-13}$     | 9.96564                           |
| 50867   | Positive regulation of cell activation                             | 27.6516          | $9.8 \times 10^{-13}$      | 9.66667                           |
| 2684    | Positive regulation of immune system process                       | 27.3908          | $1.27 \times 10^{-12}$     | 5.83524                           |
| 30098   | Lymphocyte differentiation                                         | 27.2383          | $1.48 \times 10^{-12}$     | 12.3656                           |
| 51251   | Positive regulation of lymphocyte activation                       | 27.0592          | $1.77 \times 10^{-12}$     | 10.1887                           |
| 7159    | Leukocyte cell-cell adhesion                                       | 26.5689          | $2.89 \times 10^{-12}$     | 10.4                              |
| 6955    | Immune response                                                    | 25.6371          | $7.34 \times 10^{-12}$     | 4.89731                           |
| 34109   | Homotypic cell-cell adhesion                                       | 24.897           | $1.54 \times 10^{-11}$     | 9.66543                           |
| 50851   | Antigen receptor-mediated signaling pathway                        | 24.7816          | $1.73 \times 10^{-11}$     | 11.5789                           |
| 2768    | Immune response-regulating cell surface receptor signaling pathway | 23.4633          | $6.46 \times 10^{-11}$     | 7.08333                           |
| 2521    | Leukocyte differentiation                                          | 23.458           | $6.49 \times 10^{-11}$     | 9.43396                           |
| 2429    | Immune response-activating cell surface receptor signaling pathway | 22.838           | $1.21 \times 10^{-10}$     | 8.81356                           |
| 2764    | Immune response-regulating signaling pathway                       | 21.1685          | $6.41 \times 10^{-10}$     | 6.21762                           |
| 46632   | Alpha-beta T cell differentiation                                  | 21.015           | $7.47 \times 10^{-10}$     | 28.5714                           |
| 50776   | Regulation of immune response                                      | 20.606           | $1.12 \times 10^{-9}$      | 5.01567                           |
| 34110   | Regulation of homotypic cell-cell adhesion                         | 19.2966          | $4.16 \times 10^{-9}$      | 8.02676                           |
| 2253    | Activation of immune response                                      | 19.2894          | $4.2 \times 10^{-9}$       | 6.63717                           |
| 2757    | Immune response-activating signal transduction                     | 18.9626          | $5.82 \times 10^{-9}$      | 6.91358                           |
| 50863   | Regulation of T cell activation                                    | 18.914           | $6.11 \times 10^{-9}$      | 8.18505                           |
| 46631   | Alpha-beta T cell activation                                       | 18.5652          | $8.65 \times 10^{-9}$      | 22.7273                           |
| 1903037 | Regulation of leukocyte cell-cell adhesion                         | 18.3818          | $1.04 \times 10^{-8}$      | 7.95848                           |
| 50778   | Positive regulation of immune response                             | 17.9194          | $1.65 \times 10^{-8}$      | 5.71429                           |
| 50853   | B cell receptor signaling pathway                                  | 17.6644          | $2.13 \times 10^{-8}$      | 20.8333                           |
| 2250    | Adaptive immune response                                           | 17.5544          | $2.38 \times 10^{-8}$      | 9.62567                           |
| 50870   | Positive regulation of T cell activation                           | 16.9042          | $4.56 \times 10^{-8}$      | 9.23077                           |
| 48583   | Regulation of response to stimulus                                 | 16.6195          | $6.06 \times 10^{-8}$      | 3.10453                           |
| 22407   | Regulation of cell-cell adhesion                                   | 16.6074          | $6.13 \times 10^{-8}$      | 6.75676                           |
| 34112   | Positive regulation of homotypic cell-cell adhesion                | 16.5917          | $6.23 \times 10^{-8}$      | 9.04523                           |
| 1903039 | Positive regulation of leukocyte cell-cell adhesion                | 16.5149          | $6.72 \times 10^{-8}$      | 9                                 |
| 22409   | Positive regulation of cell-cell adhesion                          | 15.8545          | $1.3 \times 10^{-7}$       | 8.18966                           |
| 42101   | T cell receptor complex                                            | 15.362           | $2.13 \times 10^{-7}$      | 40                                |
| 50852   | T cell receptor signaling pathway                                  | 15.3487          | $2.16 \times 10^{-7}$      | 10                                |

**Table S3.** *Cont.*

| GO ID | Function                                    | Enrichment Score | Enrichment <i>p</i> -Value | % Genes in Group That Are Present |
|-------|---------------------------------------------|------------------|----------------------------|-----------------------------------|
| 16337 | Single organismal cell-cell adhesion        | 15.0338          | $2.96 \times 10^{-7}$      | 6.04651                           |
| 48584 | Positive regulation of response to stimulus | 14.9962          | $3.07 \times 10^{-7}$      | 3.56037                           |
| 45785 | Positive regulation of cell adhesion        | 14.1967          | $6.83 \times 10^{-7}$      | 6.31868                           |
| 45058 | T cell selection                            | 14.0637          | $7.80 \times 10^{-7}$      | 25                                |
| 98602 | Single organism cell adhesion               | 13.9996          | $8.32 \times 10^{-7}$      | 5.72687                           |
